# Supplementary material
Source: HighWire-hosted journal article supplement (https://www.jneurosci.org/highwire/filestream/598771/field_highwire_adjunct_files/0/supl_mat_fig_5.pdf)
Supplement: supl_mat_fig_5.pdf [file supl_mat_fig_5.pdf]

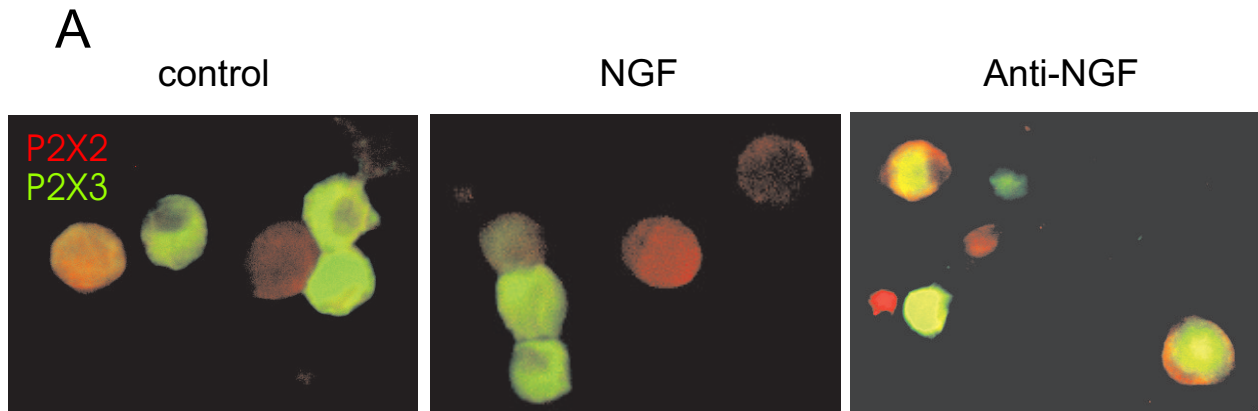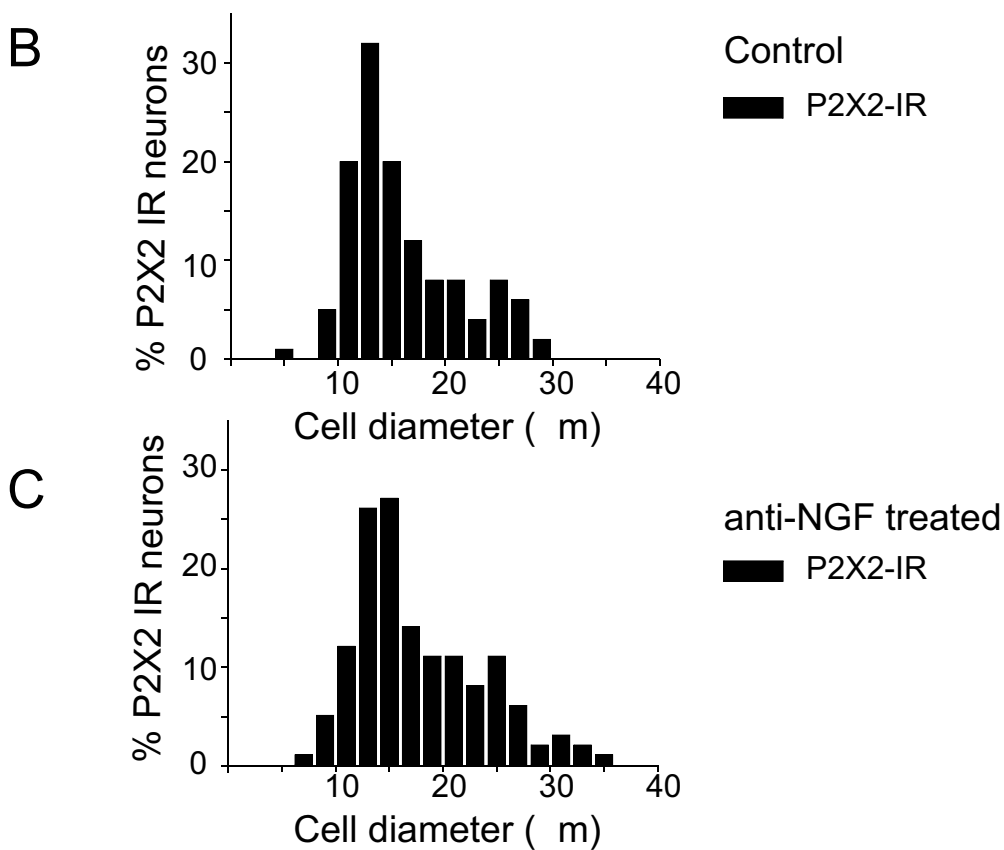

**Supplemental Figure 5. A**, Microphotographs depict TG neurons cultured in control conditions or in the presence of NGF (50 ng/ml, 24 h) or anti-NGF antibody and immunoreactive for P2X<sub>3</sub> (red) and P2X<sub>2</sub> (green). Double immunopositive cells show yellow staining. Calibration bar = 50  $\mu$ m. **B,C** Somatic size distribution of TG neurons immunoreactive for P2X<sub>2</sub> receptor in control (**B**) or in anti-NGF treated cultures (**C**;  $n = 3$  experiments). Following NGF neutralization, a higher percent of larger TG neurons expresses P2X<sub>2</sub> receptors.
